# Supplementary material for: Highly Transparent and Surface-Plasmon-Enhanced Visible-Photodetector Based on Zinc Oxide Thin-Film Transistors with Heterojunction Structure
Source: Materials (Basel). 2019 Nov 5;12(21):3639. doi: 10.3390/ma12213639 (PMC6862527; doi:10.3390/ma12213639)

Supplementary Materials

# Highly Transparent and Surface-Plasmon-Enhanced Visible-Photodetector Based on Zinc Oxide Thin-Film Transistors with Heterojunction Structure

Cheng-Jyun Wang <sup>1</sup>, Hsin-Chiang You <sup>2</sup>, Kuan Lin <sup>1</sup>, Jen-Hung Ou <sup>1</sup>, Keng-Hsien Chao <sup>1</sup> and Fu-Hsiang Ko <sup>1,\*</sup>

<sup>1</sup> Department of Materials Science and Engineering, National Chiao-Tung University, 1001 University Rd., Hsinchu 30010, Taiwan (R.O.C.); cjwang.nano03g@nctu.edu.tw (C.-J.W.); osho8888@gmail.com (K.L.); harveyou@hotmail.com.tw (J.-H.O.); lces32051.nano07g@nctu.edu.tw (K.-H.C.)

<sup>2</sup> Department of Electronic Engineering, National Chin-Yi University of Technology, No. 57, Sec. 2, Zhongshan Rd., Taiping Dist., Taichung 41170, Taiwan (R.O.C.); hcyou@ncut.edu.tw

\* Correspondence: fhko@mail.nctu.edu.tw; Tel.: +886-3-5712121

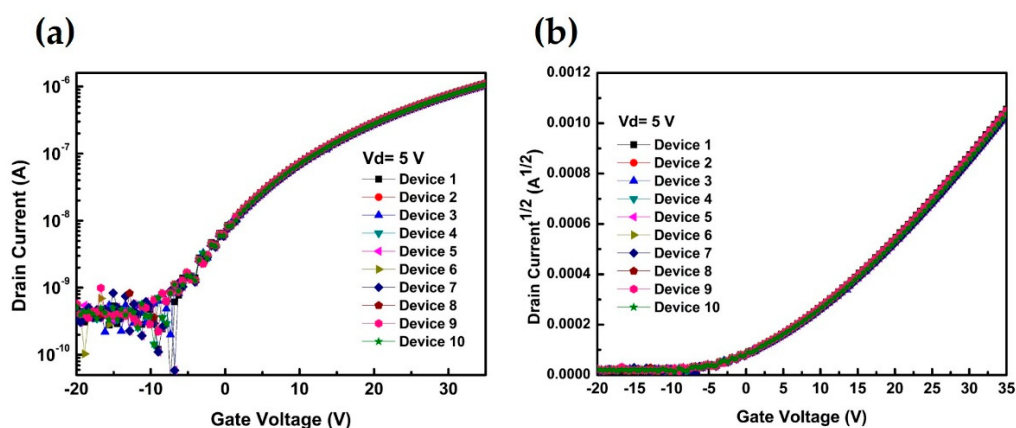

**Figure S1.** (a) Transfer characteristics of drain-source current versus gate voltage ( $I_{DS}$ - $V_{GS}$ ) of 10 devices of several semiconducting channel ZnO thin films deposited at a distance of 20 cm between the nozzle and substrate. (b) The square root of the drain current-gate voltage transfer characteristics curves of the 10 devices.

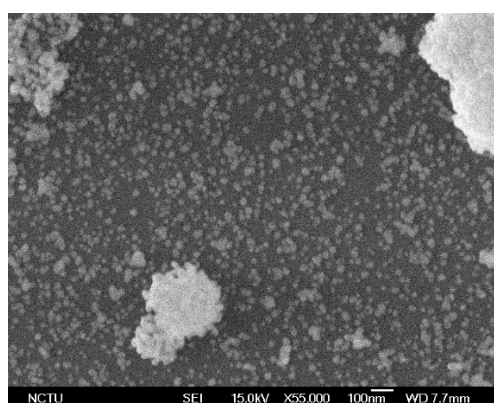

**Figure S2.** The scanning electron microscopy (SEM) image of the gold NPs under the ZnO thin-film. The scale bar in the SEM image is 100 nm.

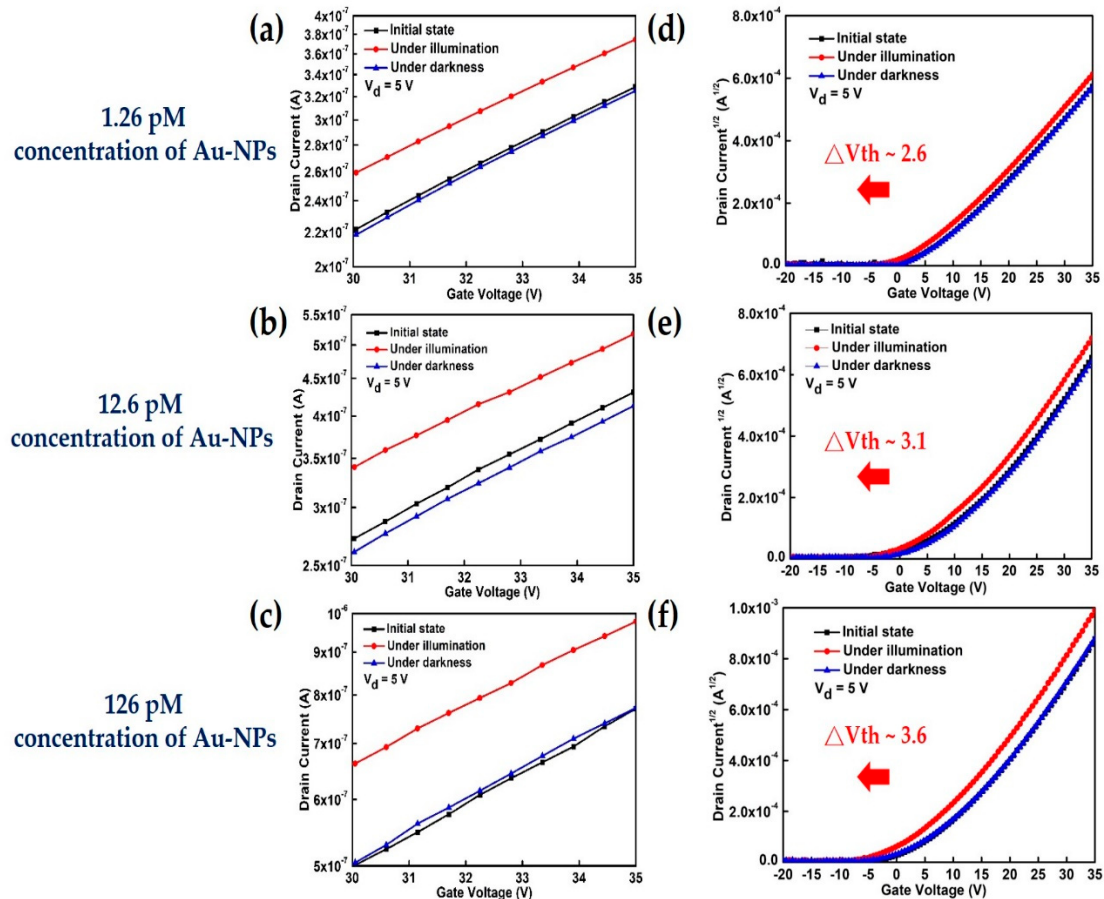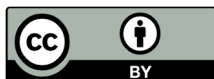

Supplement: Supplementary file 1 [file materials-12-03639-s001.pdf]
